# Supplementary material
Source: HighWire-hosted journal article supplement (https://bmjopen.bmj.com/content/12/5/e061104)
Supplement: inline-supplementary-material-1 [file inline-supplementary-material-1.pdf]

*Appendix 1. MEDLINE Search Strategy*

- 1 exp comorbidity/
- 2 Comorbid\*.mp.
- 3 co-morbid\*.mp.
- 4 exp multimorbidity/
- 5 Multimorbid\*.mp.
- 6 multi-morbid\*.mp.
- 7 multidisease\*.mp.
- 8 multi-disease\*.mp.
- 9 exp multiple chronic conditions/
- 10 "multiple chronic conditions".mp.
- 11 poly-morbidit\*.mp.
- 12 polymorbidit\*.mp.
- 13 poly-patholog\*.mp.
- 14 polypatholog\*.mp.
- 15 pluripatholog\*.mp.
- 16 pluri-patholog\*.mp.
- 17 multipatholog\*.mp.
- 18 multi-patholog\*.mp.
- 19 multicondition\*.mp.

- 20 multi-condition\*.mp.
- 21 exp Syndemic/
- 22 syndemic.mp.
- 23 "multiple health".mp.
- 24 "multiple chronic".mp.
- 25 "multiple long-term".mp.
- 26 condition\*.mp.
- 27 ill\*.mp.
- 28 disorder\*.mp.
- 29 disease\*.mp.
- 30 23 or 24 or 25
- 31 26 or 27 or 28 or 29
- 32 30 and 31
- 33 exp Diabetes Mellitus, Type 2/
- 34 "diabetes type 2".mp.
- 35 "diabetes type II".mp.
- 36 "early onset diabetes".mp.
- 37 (diabetes adj3 type 2).mp.
- 38 (diabetes adj2 type ii).mp.
- 39 (diabetes adj type two).mp.

|    |                                                    |
|----|----------------------------------------------------|
| 40 | T2DM.mp.                                           |
| 41 | T2D.mp.                                            |
| 42 | 33 or 34 or 35 or 36 or 37 or 38 or 39 or 40 or 41 |
| 43 | exp Hypertension/                                  |
| 44 | exp Blood Pressure/                                |
| 45 | “Blood Pressure”.mp.                               |
| 46 | hypertens*.mp.                                     |
| 47 | 43 or 44 or 45 or 46                               |
| 48 | exp Heart Diseases/                                |
| 49 | exp Heart Failure/                                 |
| 50 | exp Cardiovascular Diseases/                       |
| 51 | exp Coronary Disease/                              |
| 52 | cardiac.mp.                                        |
| 53 | heart.mp.                                          |
| 54 | cardiovascular.mp.                                 |
| 55 | coronary.mp.                                       |
| 56 | 52 or 53 or 54 or 55                               |
| 57 | 31 and 56                                          |
| 58 | 48 or 49 or 50 or 51 or 57                         |
| 59 | exp Vascular Diseases/                             |

- 60 exp Carotid Artery Diseases/  
61 cerebrovascular.mp.  
62 vascular.mp.  
63 Carotoid\*.mp.  
64 Arter\*.mp.  
65 61 or 62 or 63 or 64  
66 31 and 65  
67 exp Cerebrovascular Disorders/  
68 59 or 60 or 66 or 67  
69 exp Asthma/  
70 asthma\*.mp.  
71 69 or 70  
72 exp Pulmonary Disease, Chronic Obstructive/  
73 COPD.mp.  
74 "chronic obstructive pulmonary disease".mp.  
75 72 or 73 or 74  
76 exp Hyperlipidemias/  
77 exp Hypercholesterolemia/  
78 exp Hypertriglyceridemia/  
79 hyperlipid\*em\*.mp.

- 80 hypercholesterol\*emia\$.mp.
- 81 hypertriglycerid\*emia\*.mp.
- 82 76 or 77 or 78 or 79 or 80 or 81
- 83 exp Arthritis/
- 84 exp Arthritis, Rheumatoid/
- 85 exp Osteoarthritis/
- 86 arthritis.mp.
- 87 "rheumatoid arthritis".mp.
- 88 osteoarthritis.mp.
- 89 83 or 84 or 85 or 86 or 87 or 88
- 90 exp Depression/
- 91 exp Anxiety/
- 92 depression.mp.
- 93 anxiety.mp.
- 94 90 or 91 or 92 or 93
- 95 exp Neoplasms/
- 96 malignan\*.mp.
- 97 cancer.mp.
- 98 95 or 96 or 97
- 99 exp HIV/

- 100 exp Acquired Immunodeficiency Syndrome/  
101 “acquired immunodeficiency syndrome”.mp.  
102 AIDS.mp.  
103 HIV.mp.  
104 99 or 100 or 101 or 102 or 103  
105 exp Kidney Failure, Chronic/  
106 exp Kidney Diseases/  
107 exp Renal Insufficiency/  
108 renal.mp.  
109 kidney.mp.  
110 108 or 109  
111 31 and 110  
112 105 or 106 or 107 or 111  
113 exp Liver Diseases/  
114 liver.mp.  
115 31 and 114  
116 113 or 115  
117 exp Osteoporosis/  
118 osteoporosis.mp.  
119 117 or 118

|     |                                  |
|-----|----------------------------------|
| 120 | exp Obesity/                     |
| 121 | obes*.mp.                        |
| 122 | 120 or 121                       |
| 123 | exp Multiple Sclerosis/          |
| 124 | multiple sclerosis.mp.           |
| 125 | "MS".mp.                         |
| 126 | 123 or 124 or 125                |
| 127 | exp Parkinson Disease/           |
| 128 | "parkinsons disease".mp.         |
| 129 | "PD".mp.                         |
| 130 | 127 or 128 or 129                |
| 131 | peripheral artery disease.mp.    |
| 132 | exp Peripheral Arterial Disease/ |
| 133 | 131 or 132                       |
| 134 | co-occur*.mp.                    |
| 135 | cooccur*.mp.                     |
| 136 | concurrent.mp.                   |
| 137 | coexist*.mp.                     |
| 138 | co-exist*.mp.                    |
| 139 | 134 or 135 or 136 or 137 or 138  |

|     |                                                                                                                                  |
|-----|----------------------------------------------------------------------------------------------------------------------------------|
| 140 | 31 and 139                                                                                                                       |
| 141 | 1 or 2 or 3 or 4 or 5 or 6 or 7 or 8 or 9 or 10 or 11 or 12 or 13 or 14 or<br>15 or 16 or 17 or 18 or 19 or 20 or 21 or 22 or 32 |
| 142 | 42 or 47 or 58 or 68 or 71 or 75 or 82 or 89 or 94 or 98 or 104 or 112<br>or 116 or 119 or 122 or 126 or 130 or 133              |
| 143 | 140 and 142                                                                                                                      |
| 144 | 141 or 143                                                                                                                       |
| 145 | exp Frail Elderly/                                                                                                               |
| 146 | exp Frailty/                                                                                                                     |
| 147 | frail*.mp.                                                                                                                       |
| 148 | prefrail.mp.                                                                                                                     |
| 149 | pre-frail.mp.                                                                                                                    |
| 150 | "functionally-impaired".mp.                                                                                                      |
| 151 | Physical function*.mp.                                                                                                           |
| 152 | "Physical frail* ".mp.                                                                                                           |
| 153 | Debility.mp.                                                                                                                     |
| 154 | 145 or 146 or 147 or 148 or 149 or 150 or 151 or 152 or 153                                                                      |
| 155 | exp Exercise/                                                                                                                    |
| 156 | exp Physical Fitness/                                                                                                            |
| 157 | exp Sedentary Behavior/                                                                                                          |

158 exp Rehabilitation/  
159 exp Exercise Therapy/  
160 exercis\*.mp.  
161 "physical activit\*.mp.  
162 physical fitness.mp.  
163 sedentary behavio\*r".mp.  
164 sedentary.mp.  
165 rehabilitat\*.mp.  
166 "exercise therapy".mp.  
167 155 or 156 or 157 or 158 or 159 or 160 or 161 or 162 or 163 or 164 or  
165 or 166  
168 144 and 154 and 167  
169 limit 168 to yr="2000 -Current"
